# Supplementary material for: Microwave absorption enhancement, magnetic coupling and ab initio electronic structure of monodispersed (Mn1−xCox)3O4 nanoparticles
Source: Royal Society of Chemistry journal article supplement (doi:10.1039/c3nr02287k), 2013-01-01
Supplement: c3nr02287k.pdf [file c3nr02287k.pdf]

Supporting Information for “Microwave absorption enhancement, magnetic coupling and ab initio electronic structure of monodispersed  $(\text{Mn}_{1-x}\text{Co}_x)_3\text{O}_4$  nano-particles”

5

Pengfei Zhao, Xiwen Gong, Ran Gao, Chongyun Liang, Jiwei Liu, Min Wang and Renchao Che\*

Department of Materials Science and Laboratory  
of Advanced Materials, Fudan University,  
Shanghai, 200433, People’s Republic of China  
Department of Chemistry, Fudan University,  
Shanghai, 200433, People’s Republic of China

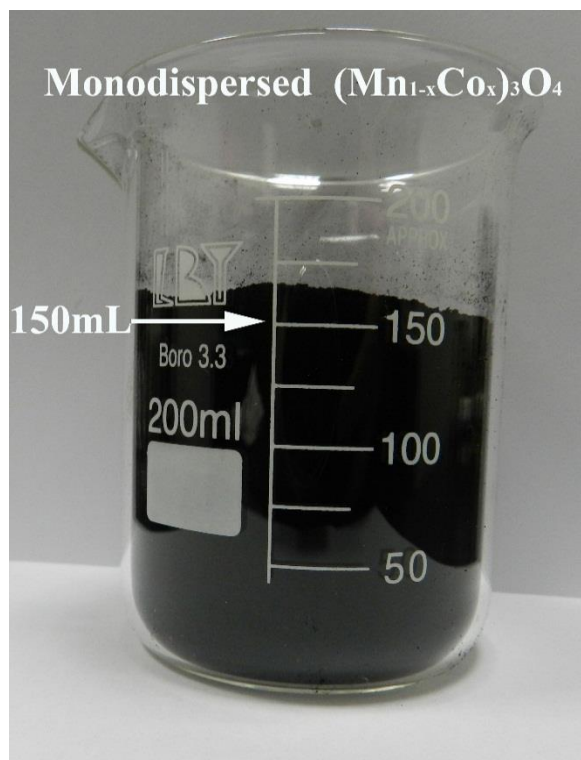

Figure S1. A digital photo showing the large-scale synthesis of our monodispersed  $(\text{Mn}_{1-x}\text{Co}_x)_3\text{O}_4$ .

15

20

25

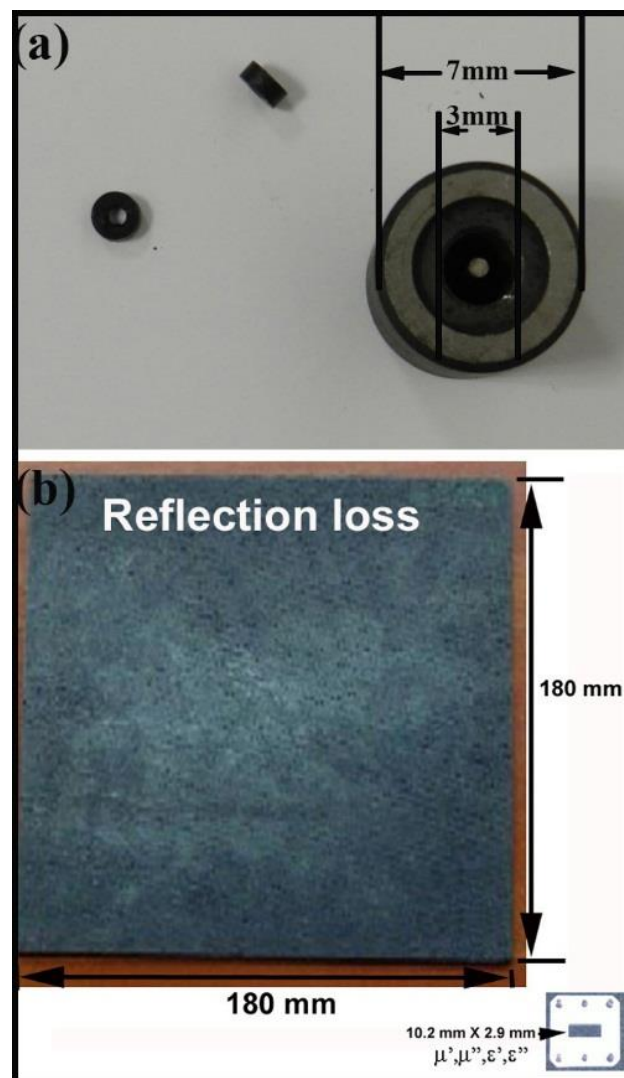

Figure S2. Microwave absorption measurements (a) co-axis method, (b) reflection sheet method.

30

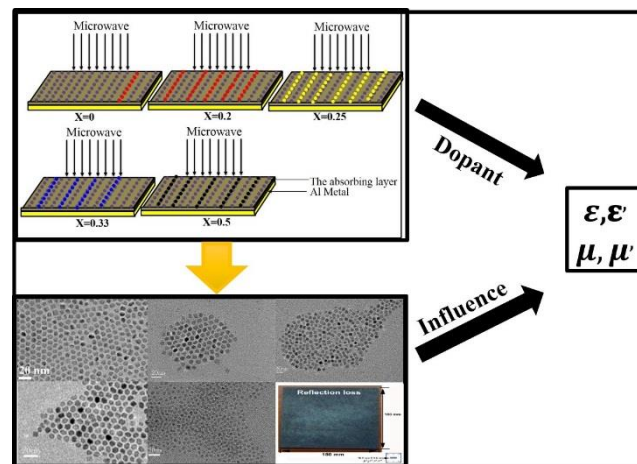

Figure S3. Schematic diagram for the microwave absorption mechanism of the  $(\text{Mn}_{1-x}\text{Co}_x)_3\text{O}_4$ .
